# Supplementary figures and images for: A single nonsynonymous mutation on ZIKV E protein-coding sequences leads to markedly increased neurovirulence in vivo
Source: PubMed Central journal article supplement — Virol Sin. 2022 Jan 21;37(1):115–26. doi: 10.1016/j.virs.2022.01.021 (PMC8922429; doi:10.1016/j.virs.2022.01.021), 2022-01-21

**A**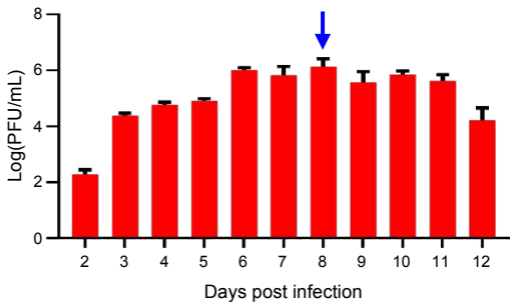**B**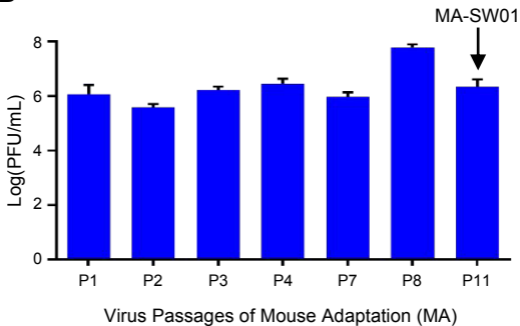

Supplement: mmc2.pdf [file mmc2.pdf]

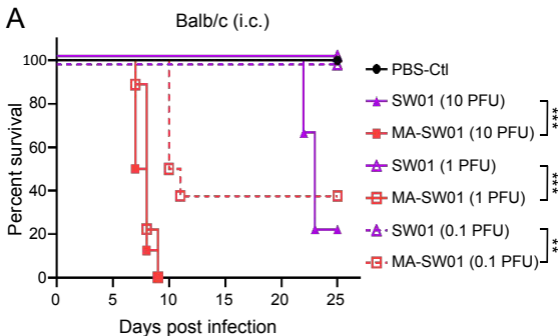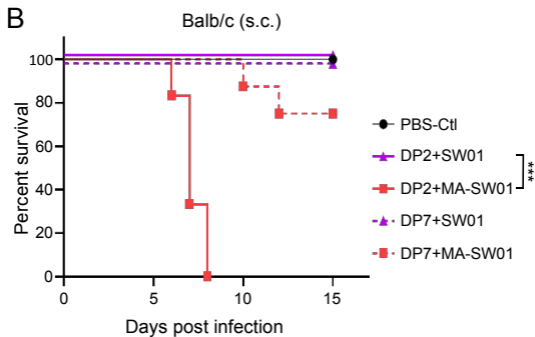

Supplement: mmc3.pdf [file mmc3.pdf]

C57BL/6 (s.c.)

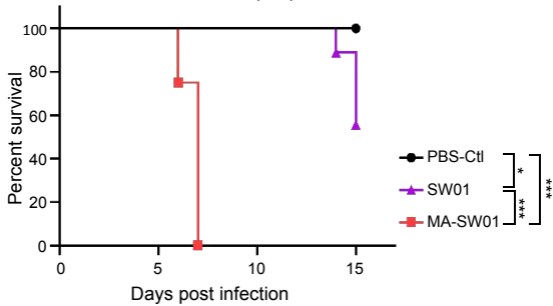

Supplement: mmc4.pdf [file mmc4.pdf]

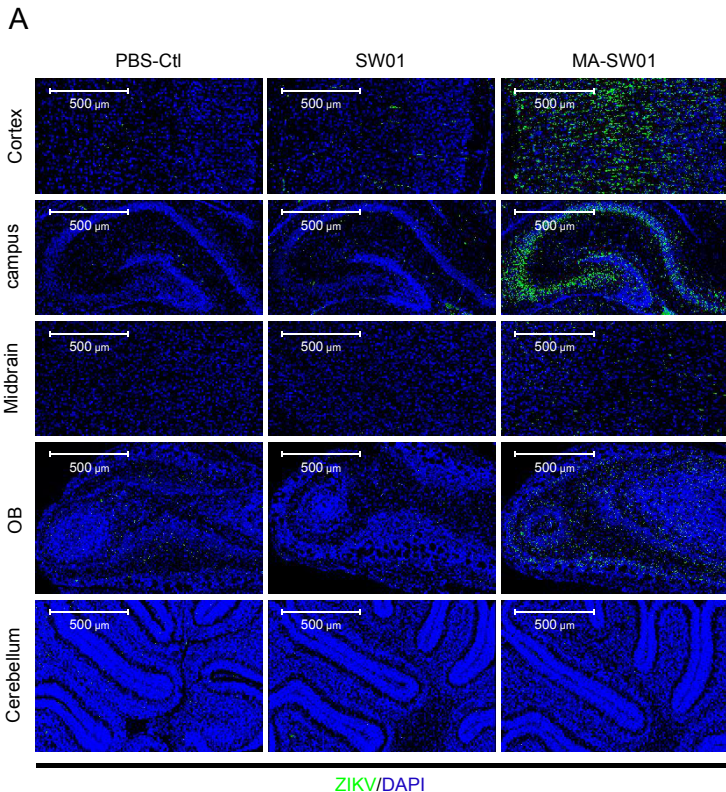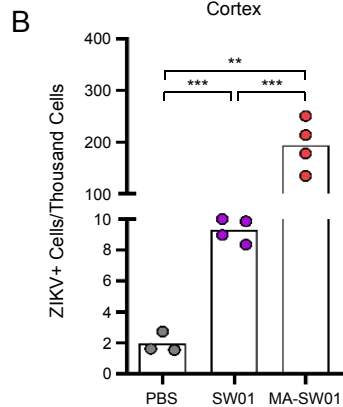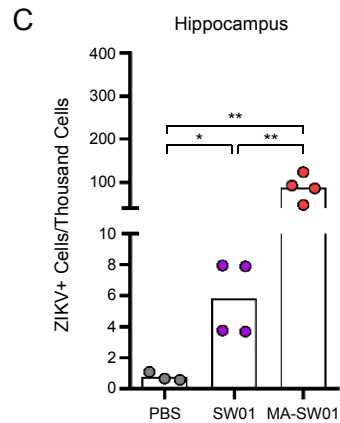

Supplement: mmc5.pdf [file mmc5.pdf]

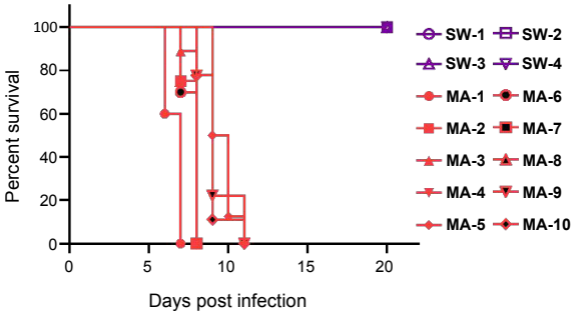

Supplement: mmc6.pdf [file mmc6.pdf]

C57BL/6 (s.c.)

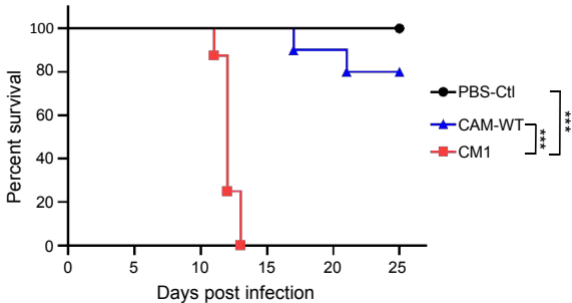

Supplement: mmc7.pdf [file mmc7.pdf]
